# Supplementary material
Source: publisher figshare collection journal article supplement (https://gsapubs.figshare.com/ndownloader/files/28042089)
Supplement: Supplementary file 1 [file 28042089]

**Supplementary Material** for Geosphere manuscript

“Jurassic-Cenozoic tectonics of the Pequop Mountains, NE Nevada, in the North American Cordillera hinterland”

Zuza, A. V., Henry, C. D., Dee, S., Thorman, C. H., and Heizler, M. T.

**Methods for argon thermochronology and multi-domain diffusion (MDD) modeling**

Argon methods

Muscovite and K-feldspar were concentrated using standard Frantz magnetic and heavy liquid techniques and final purification was conducted by choosing the most pristine grains via hand picking under a binocular microscope. Each sample was wrapped in copper foil and placed in a 24-hole, 2.54 cm diameter aluminum disk along with neutron flux monitor FC-2 sanidine (28.201 Ma; Kuiper et al., 2008) placed in every third hole around the disk. The NM-303 package was irradiated in the CLOCIT at the OSU TRIGA reactor. The samples were step-heated in the double-vacuum Nb resistance furnace with heating times between 4 and 120 minutes for the K-feldspar and between 3 and 20 minutes for the muscovite. Only the high temperature steps we conducted for the short durations. The evolved gases were exposed to a SAES GP-50 getter (operated at 450°C) during heating. Following heating, gas was expanded into a second stage and reacted for 60 seconds with a SAES GP-50 getter heated to 450°C. Argon isotopes were analyzed with a Helix MC plus multi-collector mass spectrometer.

Analytical details:

**Supplementary Table S1.** MDD argon isotopic results.

MDD analysis

Thermal histories we obtained using a multi-diffusion domain (MDD) model that follow the basic procedures of Lovera et al. (1989) and Long et al. (2019). The Arrhenius data were forward modeled with a single activation energy for each domain (41.25 kcal/mol for K-feldspar and 70.0 kcal/mol for muscovite). Thermal histories are derived by fitting the measured age spectrum with acceptable fits determined by a Chebyshev’s approximation. A minimum of 20 successful model fits is used to determine a mean and 90% confidence interval for the thermal histories. In addition to the thermal histories derived by this minimization method, forward modeling of a single thermal history the included segments of cooling and reheating derived model age spectra. This method sought to determine a single thermal history that would be compatible for both the muscovite and K-feldspar measured age spectra. Additional details of the 40Ar/39Ar analysis and MDD modeling are provided in the supplementary tables.

**Supplementary Table S2.** Domain distribution derived from MDD modeling.

**Methods for LA-ICP-MS analyses at the University of Arizona LaserChron Center**

Zircons were separated from hand samples using standard crushing, sieving, magnetic separation, and heavy liquid techniques. Separates were mounted in a 1” epoxy mount with Sri Lanka, FC-1, and R33 zircons as primary standards. Mounts were sanded down to a depth of ~20 microns, polished, imaged, and cleaned prior to isotopic analysis. U-Pb geochronology of zircons was conducted by laser ablation inductively coupled plasma mass spectrometry (LA-ICPMS) at the Arizona LaserChron Center following their standardized workflow (Gehrels et al., 2006, 2008; Gehrels and Pecha, 2014).

Analyses involve ablation of zircon with a Photon Machines Analyte G2 excimer laser equipped with HelEx ablation cell using a spot diameter of 20 microns. The ablated material is carried in helium into the plasma source of an Element2 HR ICPMS, which sequences rapidly through U, Th, and Pb isotopes. Signal intensities are measured with an SEM that operates in pulse counting mode for signals less than 50K cps, in both pulse-counting and analog mode for signals between 50K and 5M cps, and in analog mode above 5M cps. The calibration between pulse-counting and analog signals is determined line-by-line for signals between 50K and 5M cps, and is applied to >5M cps signals. Four intensities are determined and averaged for each isotope, with dwell times of 0.0052 sec for 202, 0.0075 sec for 204, 0.0202 sec for 206, 0.0284 sec for 207, 0.0026 sec for 208, 0.0026 sec for 232, and 0.0104 sec for 238. With the laser set an energy density of ~5 J/cm2, a repetition rate of 8 hz, and an ablation time of 10 seconds, ablation pits are ~12 microns in depth. Sensitivity with these settings is approximately ~5,000 cps/ppm. Each analysis consists of 5 sec on peaks with the laser off (for backgrounds), 10 sec with the laser firing (for peak intensities), and a 20 second delay to purge the previous sample and save files. More information can be found at Arizona LaserChron Center’s website: <https://sites.google.com/a/laserchron.org/laserchron>. Data and filter methods are showing in Zircon Supplemental Table 1.

**
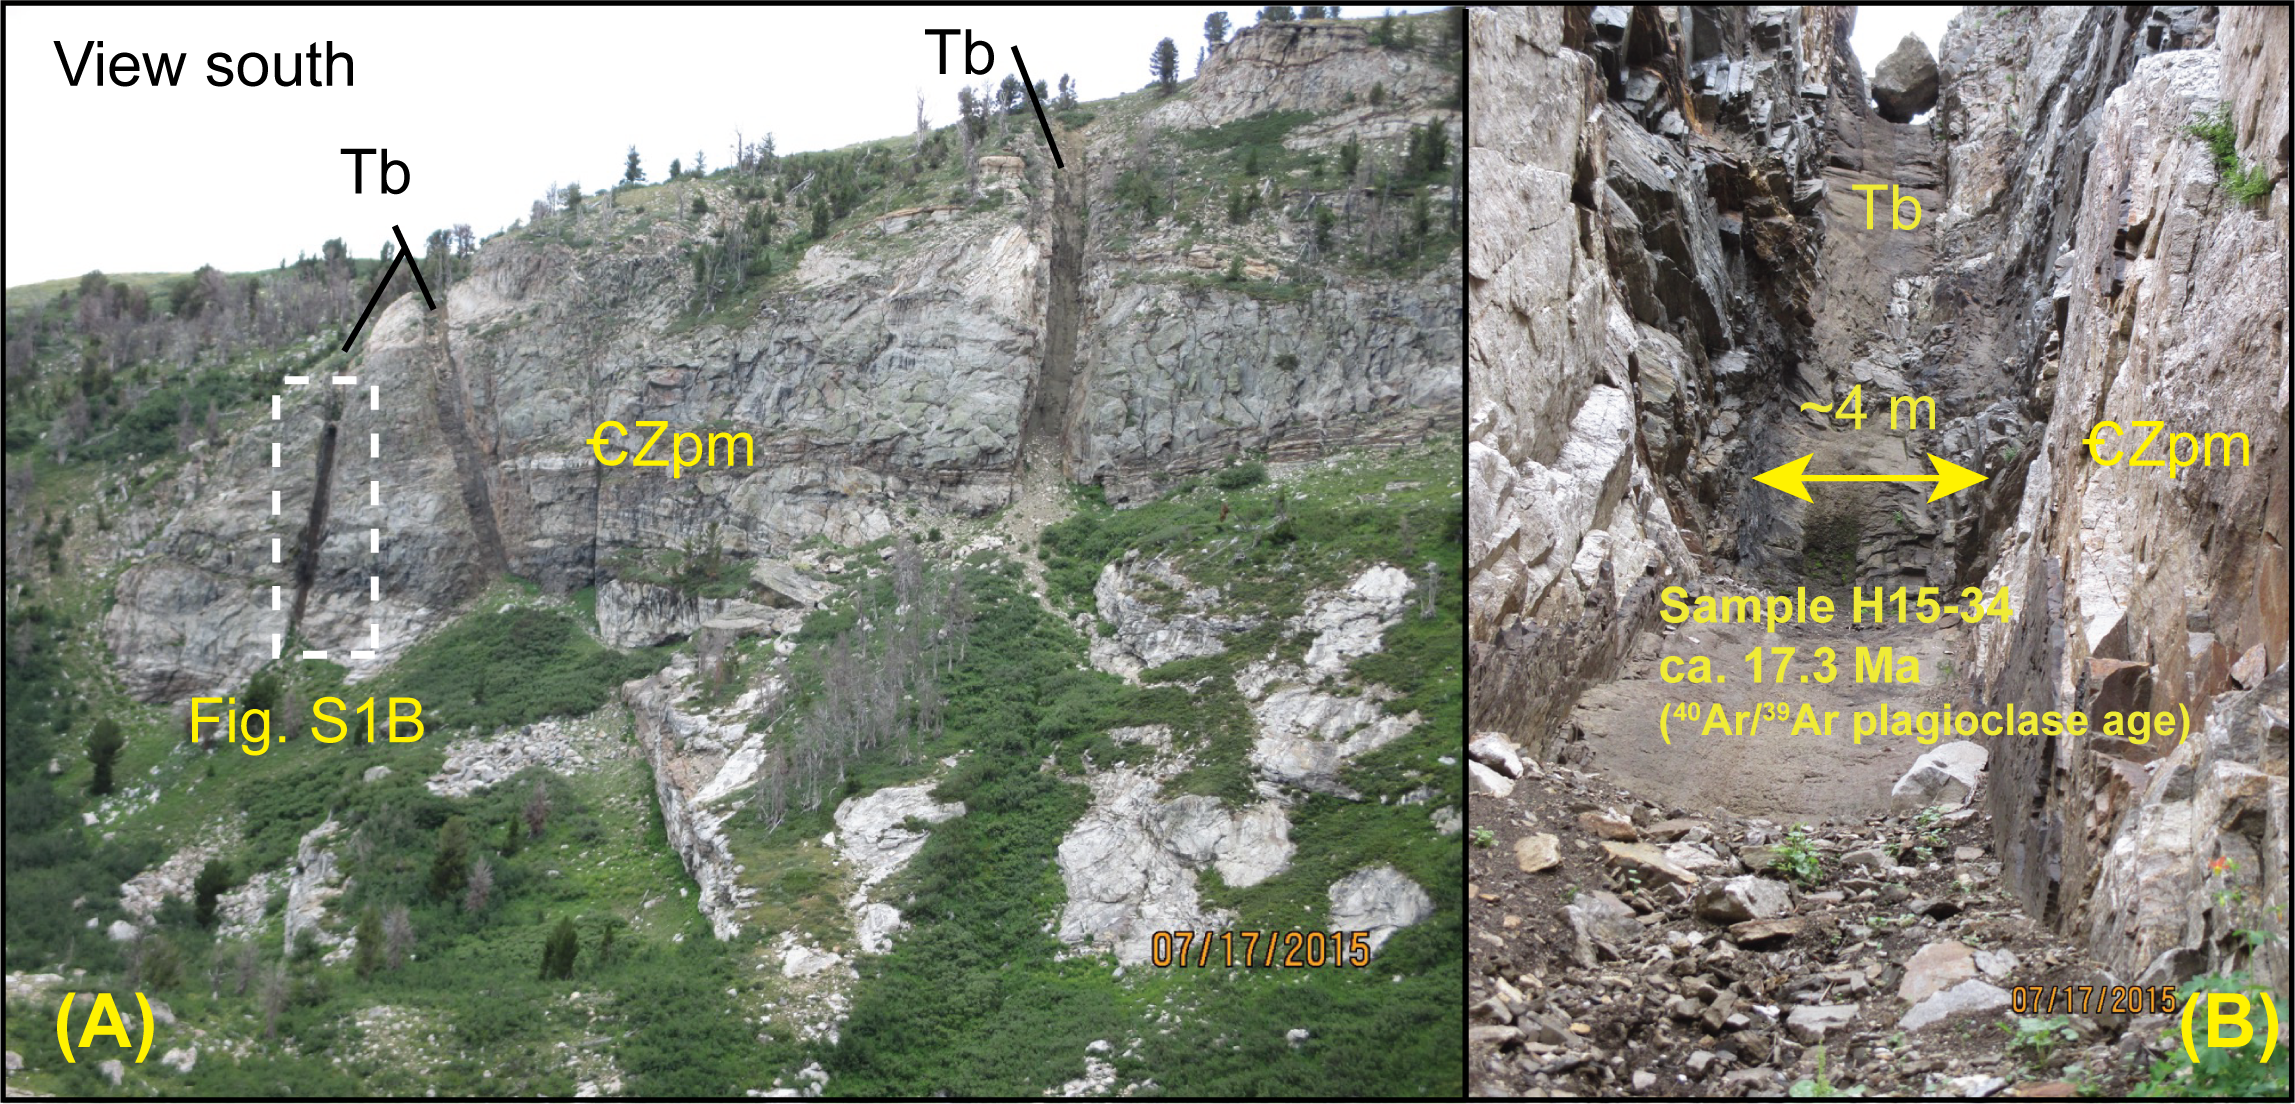
**

**Supplementary Figure S1.** Outcrop photographs of the dated basalt dikes (Tb) that crosscut the mylonitic shear zone at Angel Lake in the East Humboldt Range. Photos taken just south of Angle Lake. Basalt cuts Neoproterozoic-Cambrian Prospect Mountain Quartzite (_Zpm). Sample H15-34 yielded a plagioclase 40Ar/39Ar age of ca. 17.3 Ma (Table 2). Panel A shows three steep basalt dikes cutting _Zpm and panel B shows a close-up view of the dated easternmost dike.

**
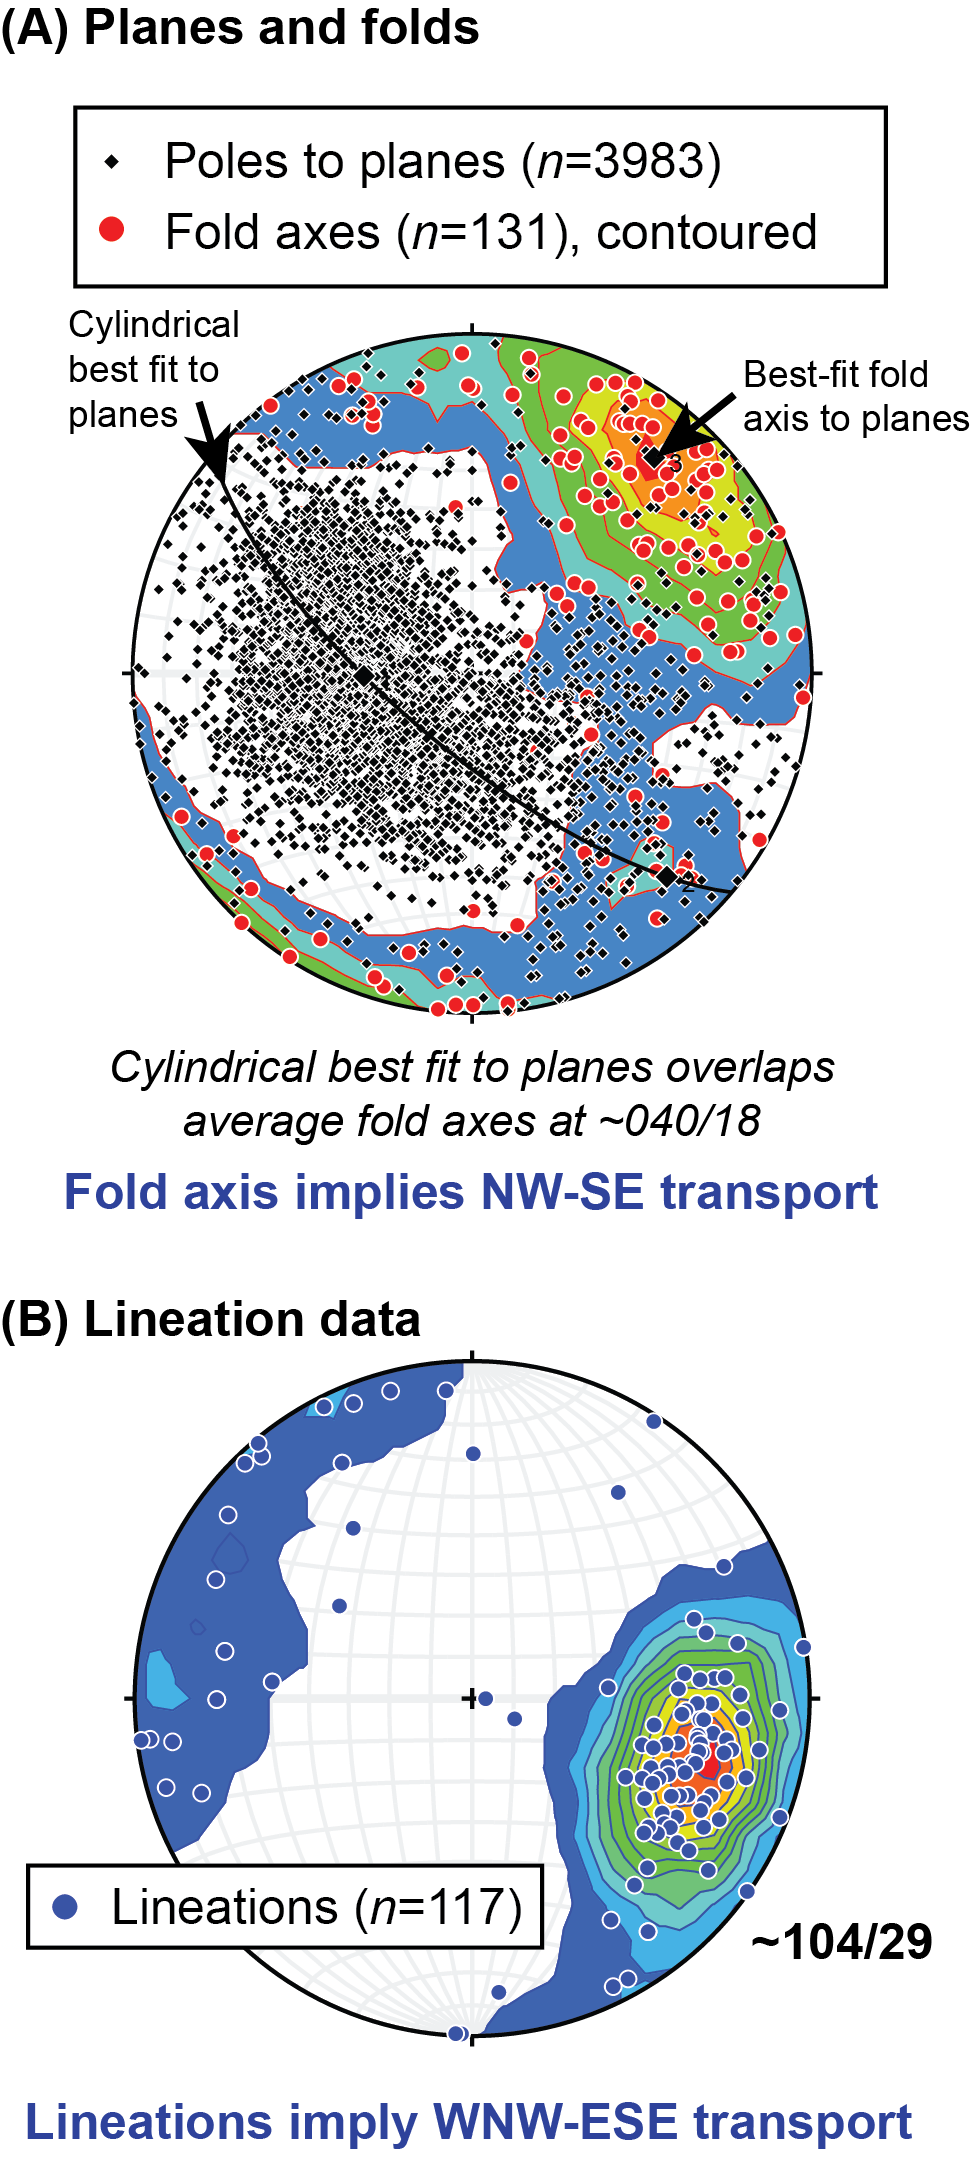
**

**Supplementary Figure S2.** Structural data from the northern Pequop Mountains from our mapping efforts on a lower hemisphere stereonet. (A) Poles to planes for foliations and bedding, and minor fold axes; contours are for the fold axes. A best fit to the plane data suggests a cylindrical fold with an axis that parallels the contoured fold-axis maximum suggesting that the entire map area is folded about a similar axes as fold axes observed in the field. These observations suggest northwest-southeast contraction. (B) Lineations, which are contoured, also suggesting northwest-southeast transport.

**
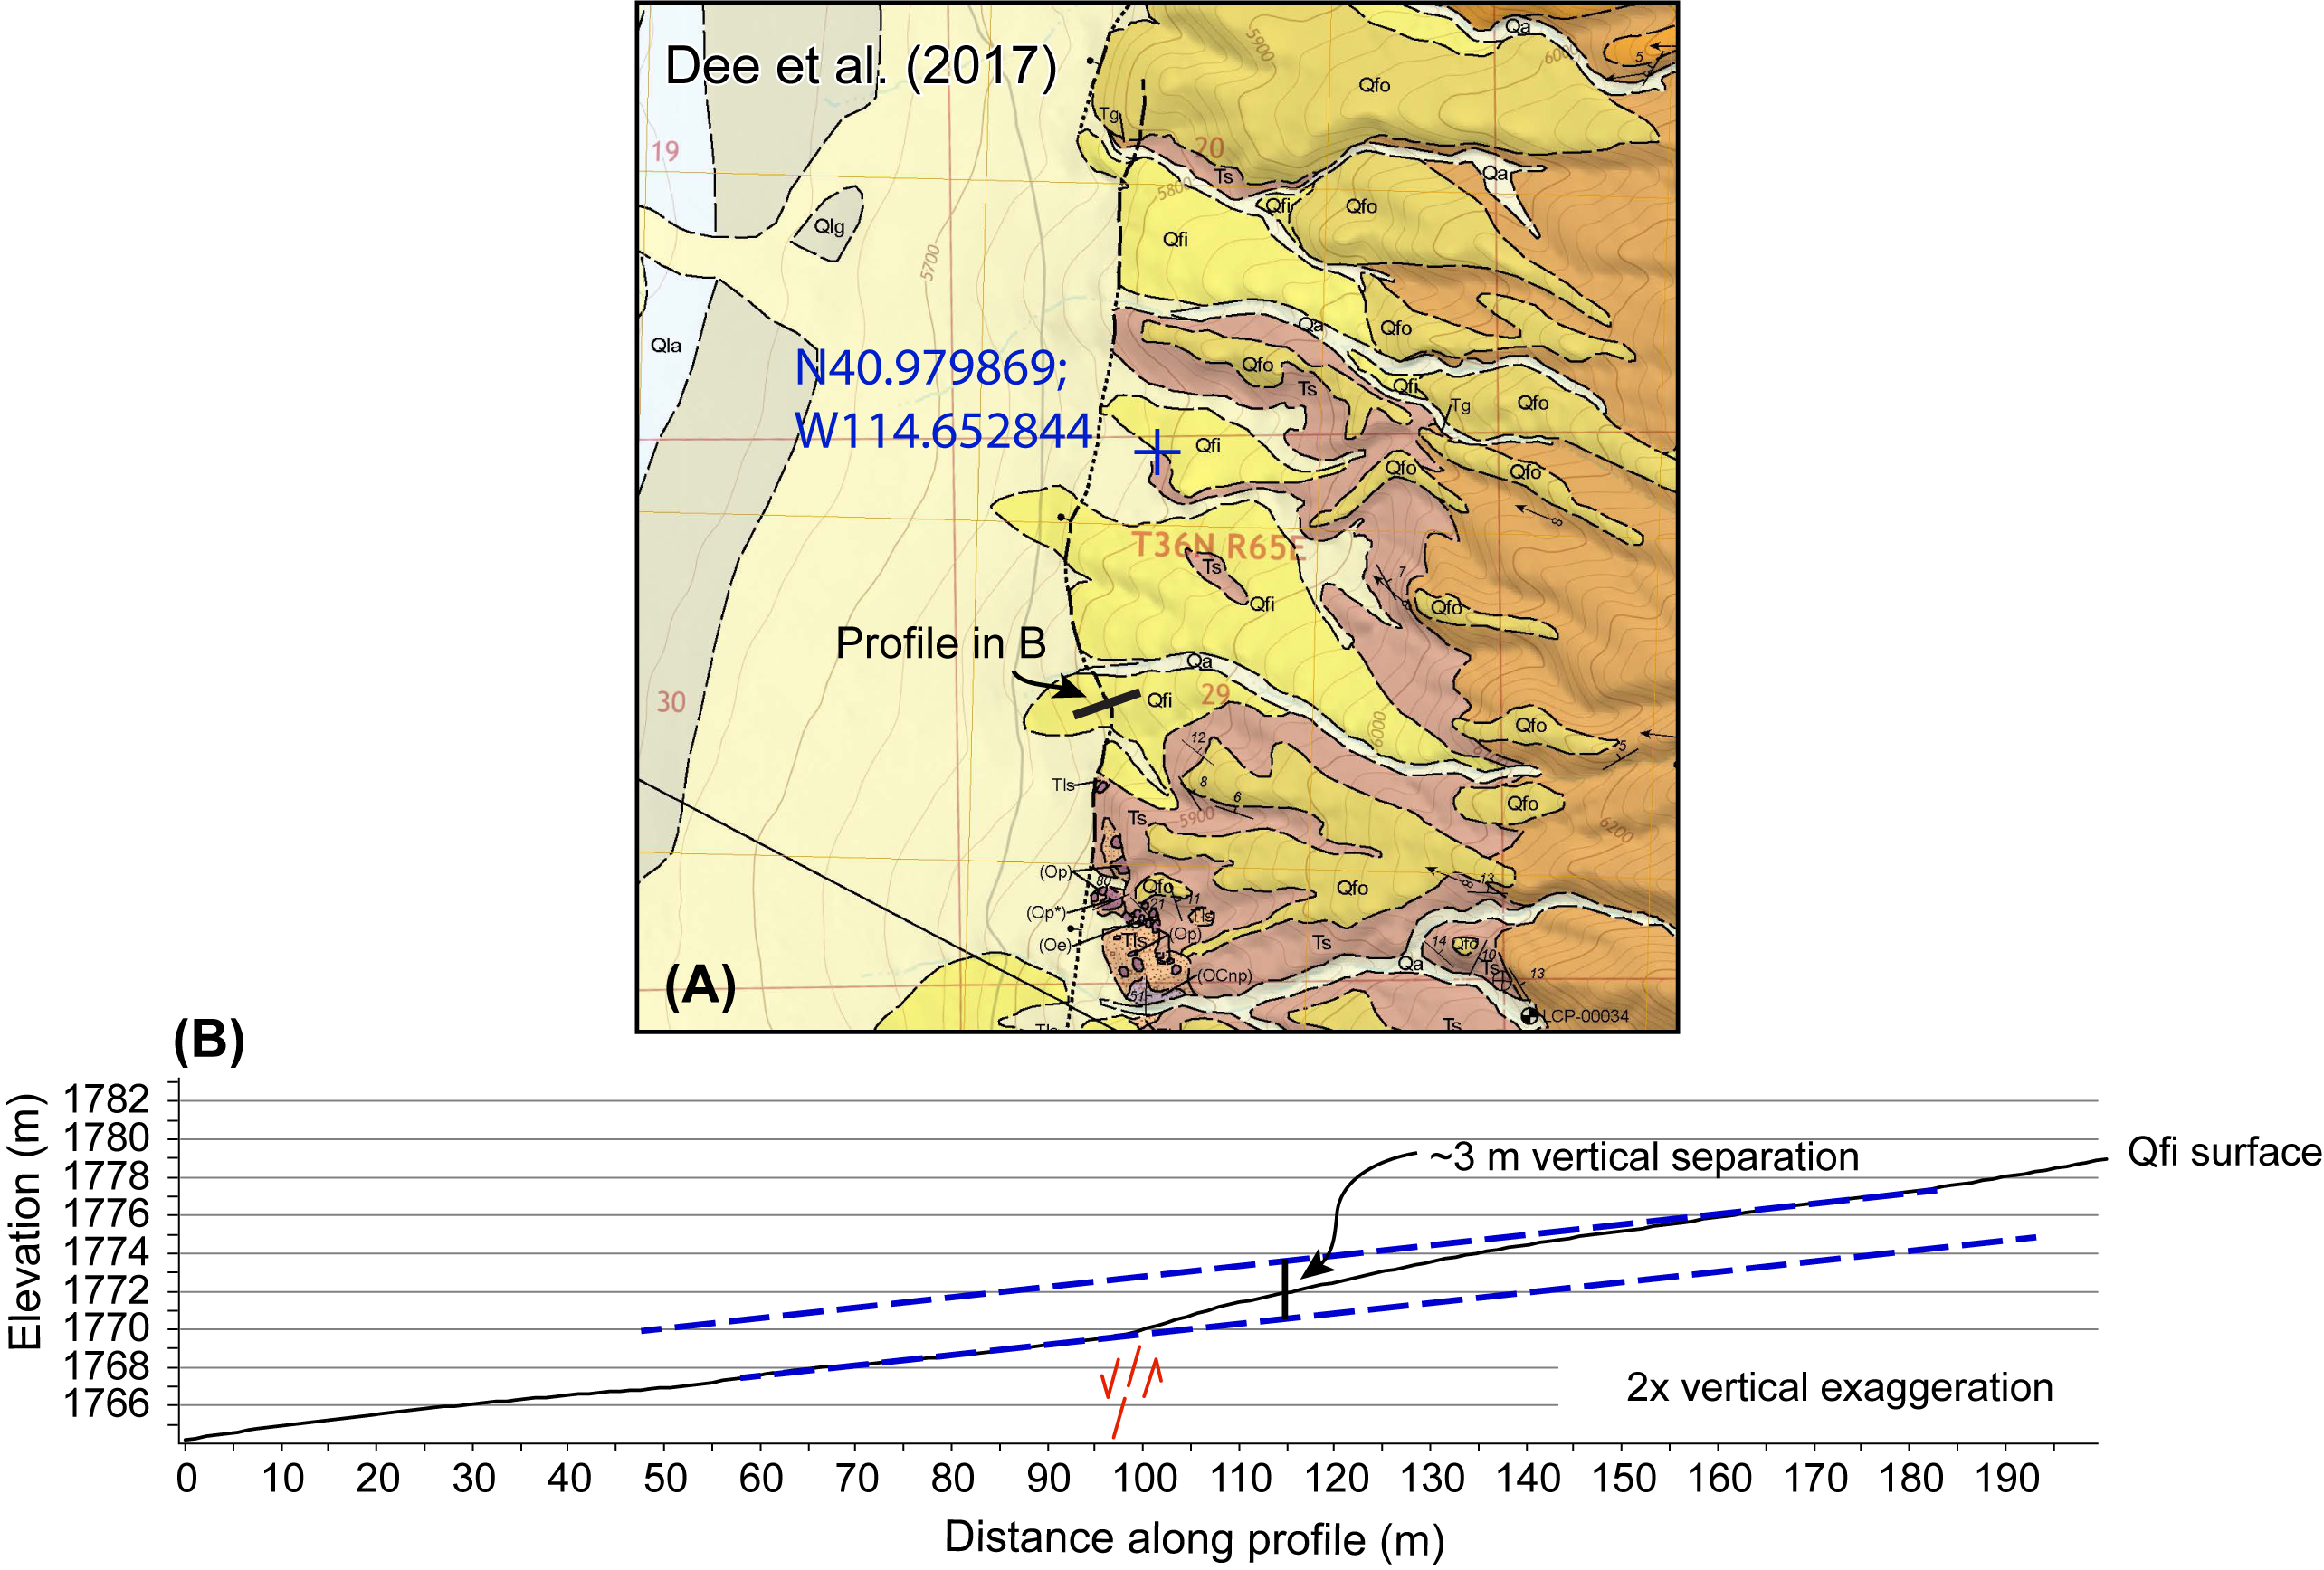
**

**Supplementary Figure S3.** (A) Portion of geologic map from Plate 1 (Dee et al., 2017; Zuza et al., 2019a) showing normal fault that offset late Pleistocene fan surface (Qfi). Thick black line shows profile location in Fig. S3B. (B) Topographic profile across fault that cut Qfi, demonstrating ~3 m vertical separation. The fan surface has not been dated, but is older than the pluvial Lake Clover highstand at 17.3-19.5 ka (Munroe and Laabs, 2013).

**Disclaimer:**

Any use of trade, firm, or product names is for descriptive purposes only and does not imply endorsement by the U.S. Government.

**Supplemental References (not cited in main text)**

Gehrels, G., and Pecha, M., 2014, Detrital zircon U-Pb geochronology and Hf isotope geochemistry of Paleozoic and Triassic passive margin strata of western North America: Geosphere, v. 10, no. 1, p. 49-65.

Gehrels, G. E., Valencia, V. A., and Ruiz, J., 2008, Enhanced precision, accuracy, efficiency, and spatial resolution of U‐Pb ages by laser ablation–multicollector–inductively coupled plasma–mass spectrometry: Geochemistry, Geophysics, Geosystems, v. 9, no. 3.

Gehrels, G., Valencia, V., and Pullen, A., 2006, Detrital zircon geochronology by laser-ablation multicollector ICPMS at the Arizona LaserChron Center: The Paleontological Society Papers, v. 12, p. 67-76.

Kuiper, K. F., Deino, A., Hilgen, F. J., Krijgsman, W., Renne, P. R., and Wijbrans, A. J., 2008, Synchronizing rock clocks of Earth history: Science, v. 320, no. 5875, p. 500-504.

Min, K., Mundil, R., Renne, P. R., and Ludwig, K. R., 2000, A test for systematic errors in 40Ar/39Ar geochronology through comparison with U/Pb analysis of a 1.1-Ga rhyolite: Geochimica et Cosmochimica Acta, v. 64, no. 1, p. 73-98.

Steiger, R. H., and Jäger, E., 1977, Subcommission on geochronology: Convention on the use of decay constants in geo- and cosmochronology: Earth and Planetary Science Letters, v. 36, p. 359-362.
